# Supplementary material
Source: PubMed Central journal article supplement (PMC10287063)
Supplement: NIHMS1883043-supplement-1.pdf [file NIHMS1883043-supplement-1.pdf]

Supplementary Table S1. Summary of GOF vs. LOF activities of p53(A347D) in U2OS cells

| Loss-of-Function                   | Gain-of-Function                                    |
|------------------------------------|-----------------------------------------------------|
| WT p53 chromatin binding profile   | Mutant p53 chromatin binding profile                |
| WT p53 transcriptional activity    | Aberrant mitochondrial morphology                   |
| Tumorigenicity in xenograft models | Hypersensitivity to certain chemotherapeutic agents |
|                                    | Increased glycolysis                                |
|                                    | Increased growth in 2D culture conditions           |
