# Supplementary material
Source: PubMed Central journal article supplement (PMC10287063)
Supplement: NIHMS1883043-supplement-2.pdf [file NIHMS1883043-supplement-2.pdf]

Supplementary Table S2. Characteristics of LFS patients fibroblasts and derivatives

| <b>LFS Fibroblasts</b>                                               | <b>Derivatives (MSCs/OBs)</b>                       |
|----------------------------------------------------------------------|-----------------------------------------------------|
| Preferential dimer formation                                         | Increased tumorigenicity                            |
| Attenuated p53 target transactivation                                | Attenuated p53 target transactivation               |
| Increased invasion from preformed spheroids in 3D culture conditions | Hypersensitivity to certain chemotherapeutic agents |
|                                                                      | Glycolysis and OXPHOS pathway enrichment            |
