# Supplementary material
Source: PubMed Central journal article supplement (PMC10287063)
Supplement: NIHMS1883043-supplement-3.pdf [file NIHMS1883043-supplement-3.pdf]

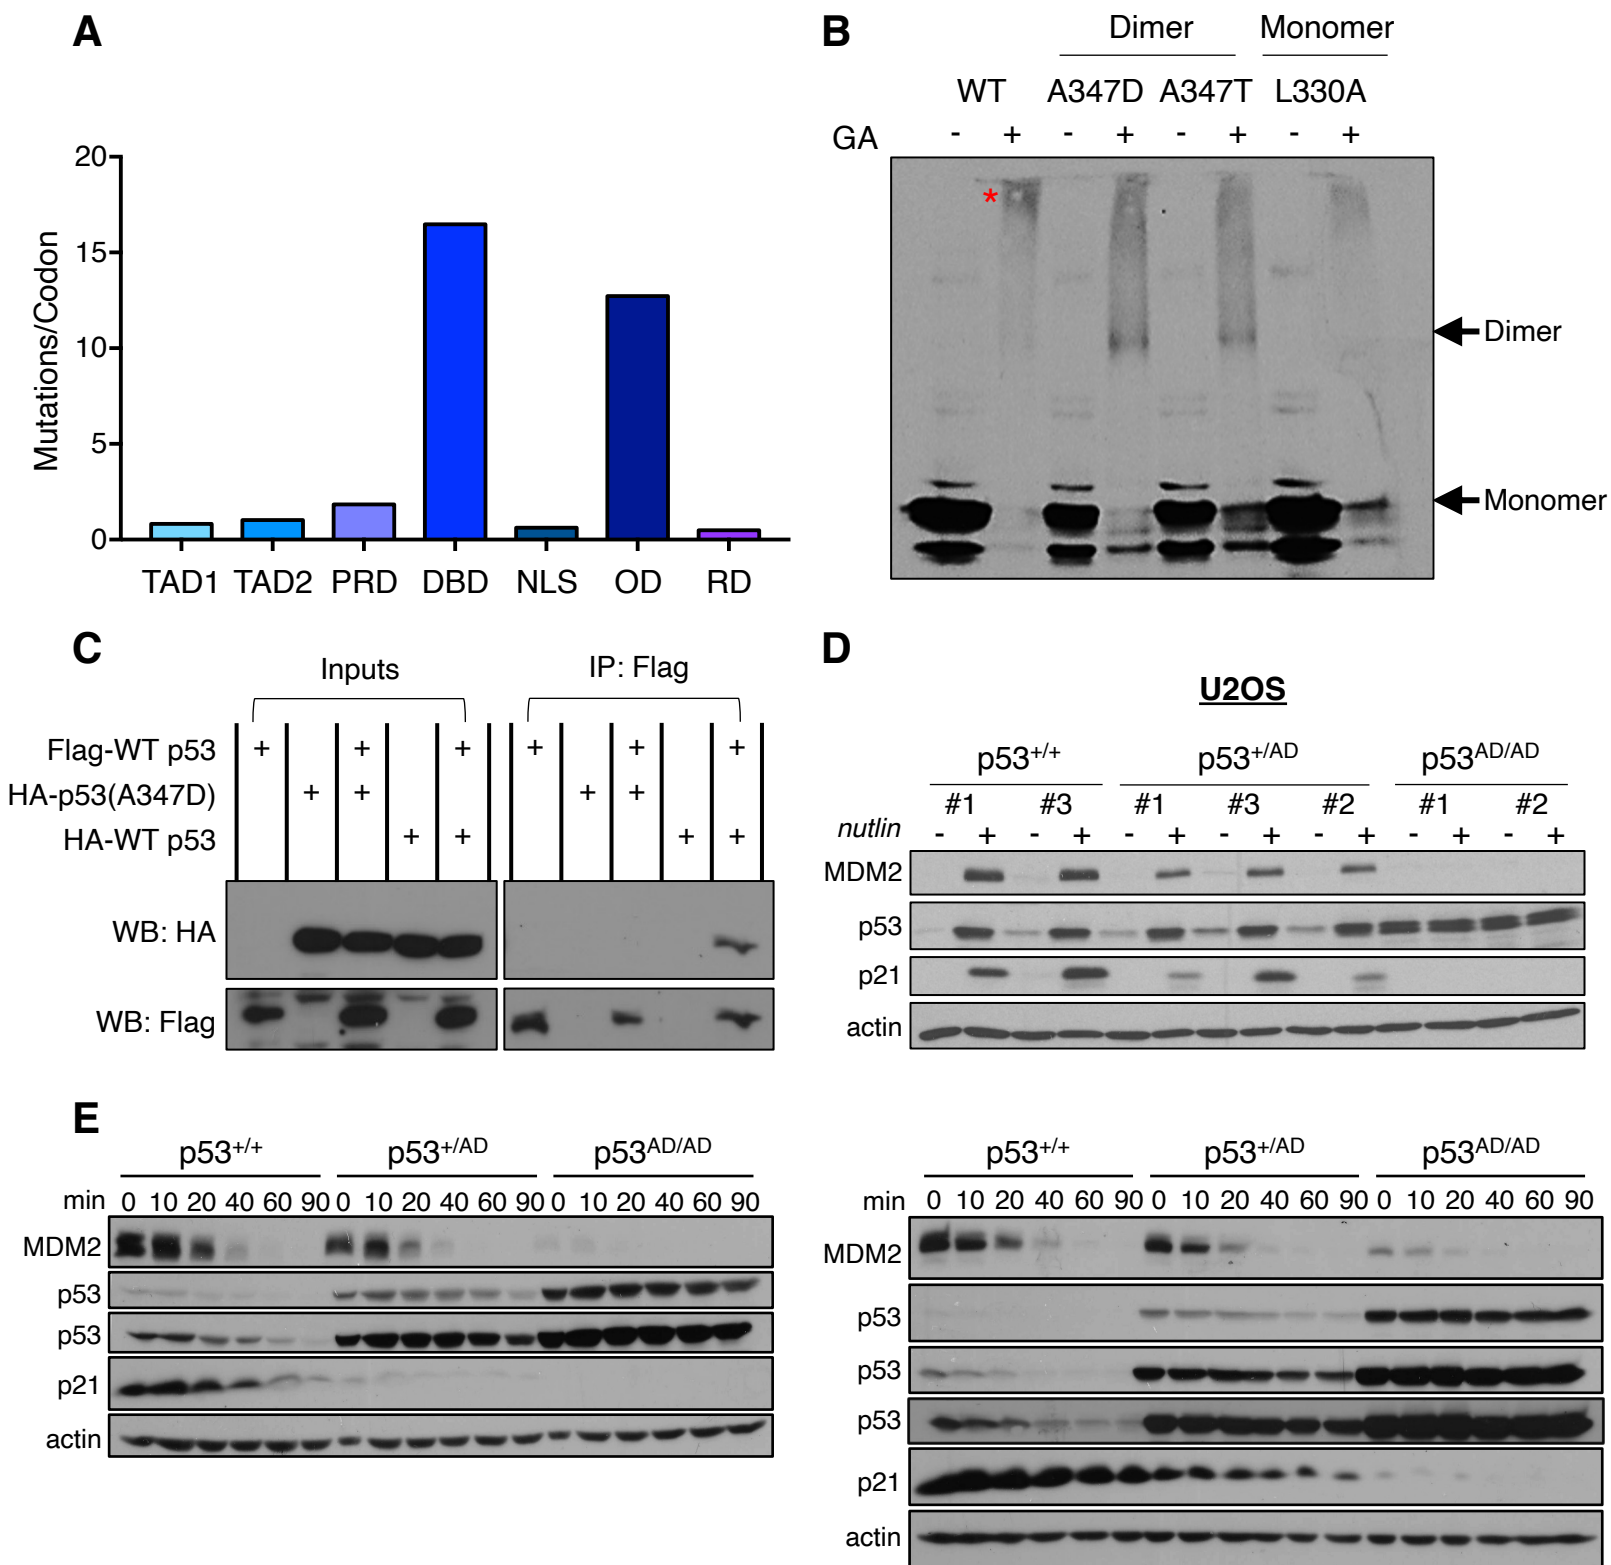

**Supplementary Figure S1. Hyper-stable p53(A347D) preferentially forms dimers and may not hetero-tetramerize with WT p53**

**(A)** The frequency of p53 germline mutations relative to the length of the domain in which the mutation occurs was calculated from data obtained from The *TP53* Database (R20, 2019). Domain abbreviations are defined thus: TAD1 – Transactivation Domain 1 (1-42), TAD2 – Transactivation Domain 2 (43-61), PRD – Proline-Rich Domain (42-98), DBD – DNA-binding domain (101-292), NLS – Nuclear Localization Signal (316-323), OD – Oligomerization Domain (324-356), RD (362-393).

**(B)** Plasmids expressing WT p53, p53(A347D), p53-A347T, or p53-L330A were transfected into H1299 lung adenocarcinoma cells. Protein lysates extracted were incubated in the presence or absence of 0.05% glutaraldehyde for 20 min at room temperature (RT) and subjected to immunoblot analysis with a monoclonal p53 antibody (DO1/1801) to detect p53 oligomeric species. Red asterisk denotes the likely tetrameric species.

**Supplementary Figure S1. Hyper-stable p53(A347D) preferentially forms dimers and may not heterotetramerize with WT p53**

**(C)** Plasmids expressing Flag-tagged WT p53, HA-tagged p53(A347D), and/or HA-tagged WT p53 were transfected into U2OS p53 KO cells according to the indicated combinations. Protein lysates were isolated and subjected to immunoprecipitation with anti-FLAG antibody followed by immunoblotting with either anti-HA or anti-FLAG antibodies.

**(D)** Single CRISPR clones of U2OS cells varying in p53 status as indicated were treated with 10  $\mu$ M nutlin-3a for 24 h and then lysed. Protein lysates were then subjected to immunoblot analysis with antibodies against indicated proteins.

**(E)** Following the addition of cycloheximide (100  $\mu$ g/mL), U2OS cells expressing WT p53, p53<sup>+/AD</sup>, and p53<sup>AD/AD</sup> were harvested at the indicated times. Cell lysates were then subjected to immunoblotting. Left and right blots represent two biologically independent experiments.

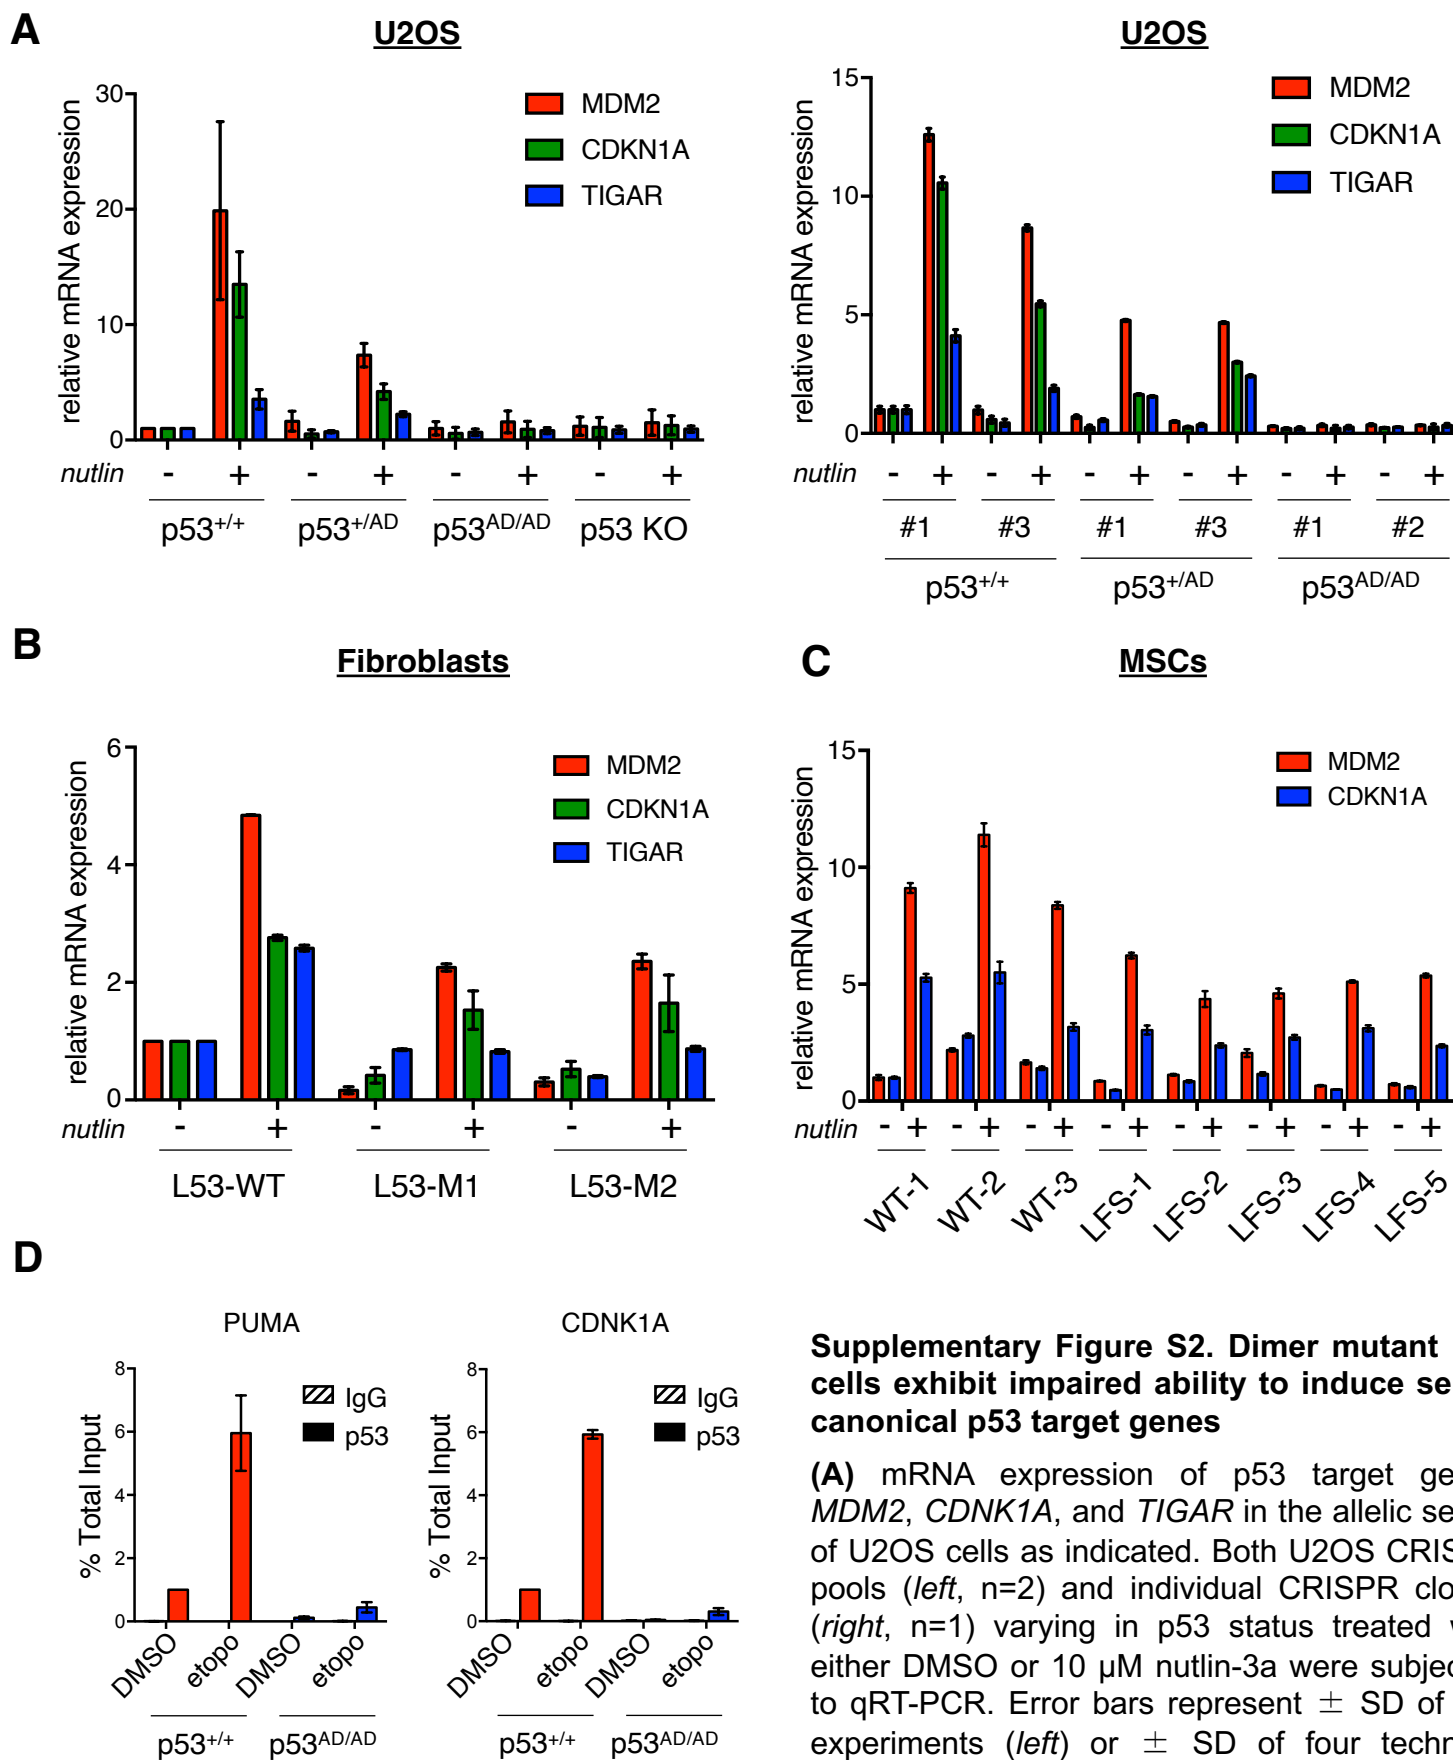

### Supplementary Figure S2. Dimer mutant p53 cells exhibit impaired ability to induce select canonical p53 target genes

**(A)** mRNA expression of p53 target genes *MDM2*, *CDKN1A*, and *TIGAR* in the allelic series of U2OS cells as indicated. Both U2OS CRISPR pools (*left*,  $n=2$ ) and individual CRISPR clones (*right*,  $n=1$ ) varying in p53 status treated with either DMSO or 10  $\mu$ M nutlin-3a were subjected to qRT-PCR. Error bars represent  $\pm$  SD of two experiments (*left*) or  $\pm$  SD of four technical replicates (*right*).

**(B)** mRNA expression of p53 target genes *MDM2*, *CDKN1A*, and *TIGAR* in patient-derived dermal fibroblasts varying in p53 status treated with either DMSO or 10  $\mu$ M nutlin-3a was assessed by qRT-PCR. Error bars represent  $\pm$  SEM of two experiments.

**Supplementary Figure S2. Dimer mutant p53 cells exhibit impaired ability to induce select canonical p53 target genes**

**(C)** mRNA expression of p53 target genes *MDM2* and *CDNK1A* in single clones of either WT or LFS mesenchymal stem cells (MSCs) treated with either DMSO or 10  $\mu$ M nutlin-3a was assessed by qRT-PCR. Error bars represent  $\pm$  SEM of three experiments.

**(D)** U2OS p53<sup>+/+</sup> and p53<sup>AD/AD</sup> cells were seeded in 15 cm plates and treated for 24 h with either DMSO or 20  $\mu$ M etoposide. Cells were harvested, crosslinked, and subjected to ChIP-qPCR to assess endogenous p53 binding on indicated promoters. Data represent a minimum of 3 biologically independent experiments and were normalized within each experiment to the p53 signal in DMSO-treated U2OS parental condition. Bars represent mean  $\pm$  SEM.

**A**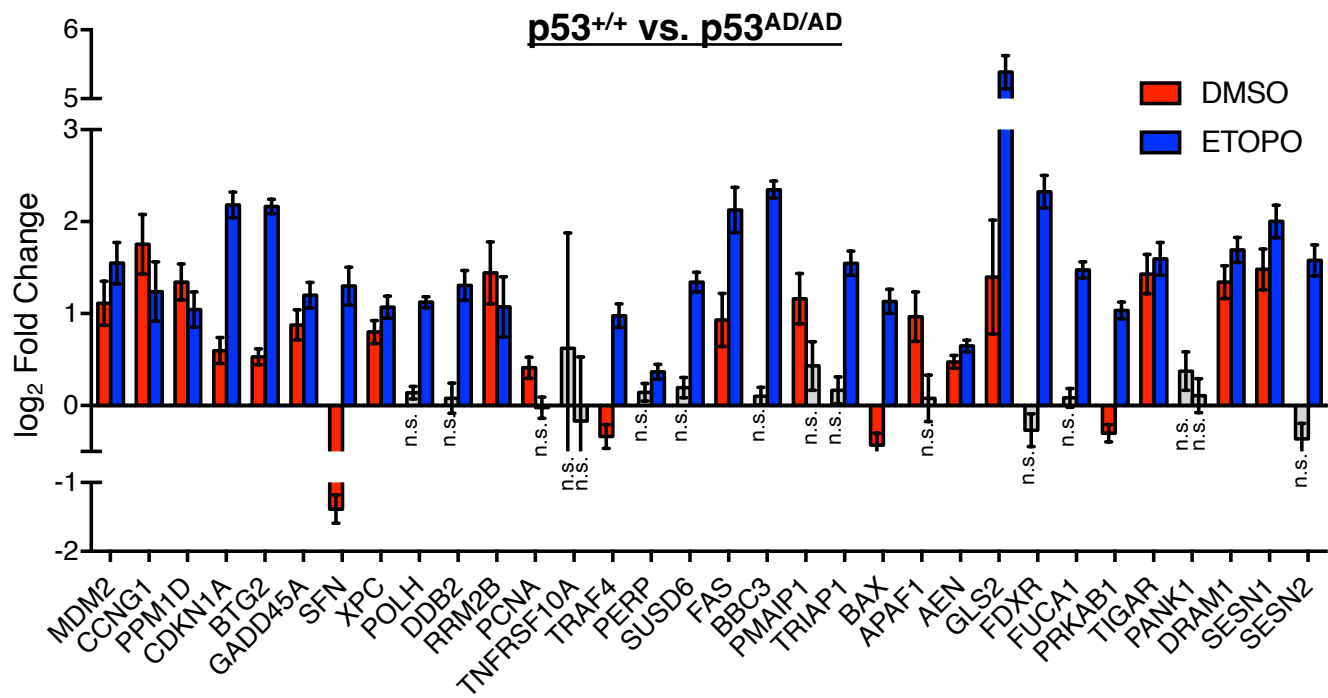**B**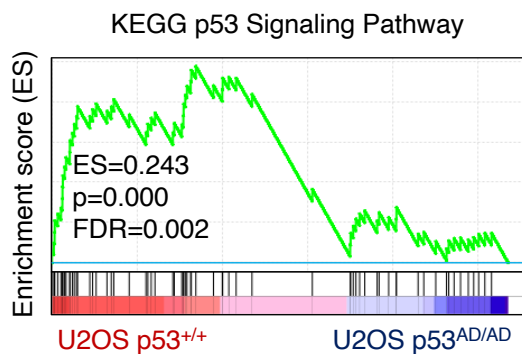**C**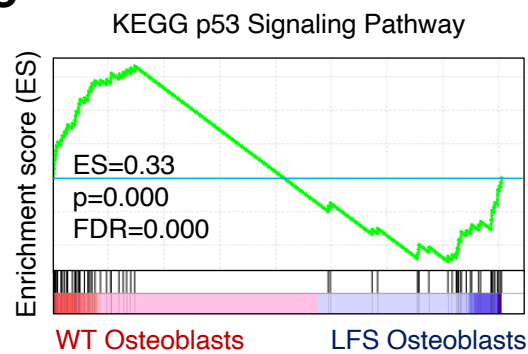

**Supplementary Figure S3. Transcriptional profiling reveals decreased expression of canonical p53 targets in dimeric mutant p53-bearing cells**

**(A)** Differential gene expression of canonical p53 targets in p53<sup>+/+</sup> relative to p53<sup>AD/AD</sup> cells treated with DMSO or 20  $\mu$ M etoposide are shown as log<sub>2</sub> fold change. Data represent mean  $\pm$  SEM for four technical replicates. Bars in color represent log<sub>2</sub> fold change values with a p<0.05.

**(B-C)** Enrichment plots of GSEA results demonstrating significant enrichment of KEGG p53 signaling pathway genes in U2OS p53<sup>+/+</sup> cells and WT osteoblasts relative to U2OS p53<sup>AD/AD</sup> cells and LFS osteoblasts, respectively.

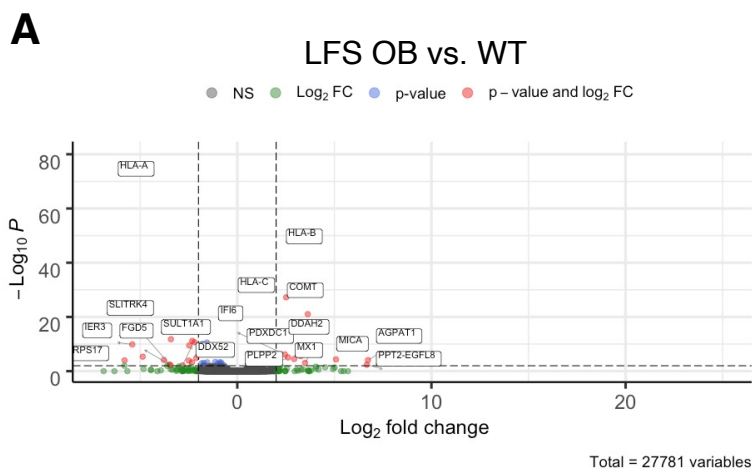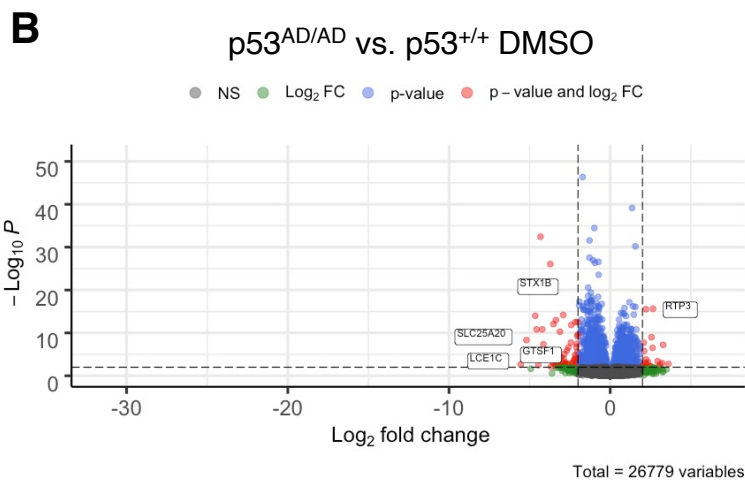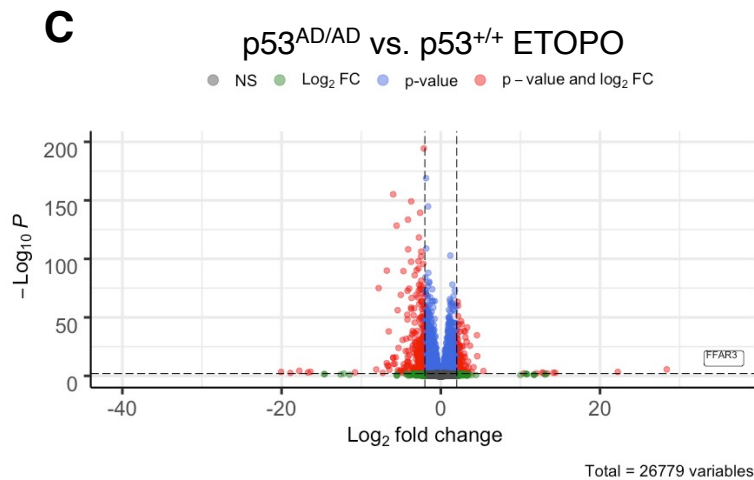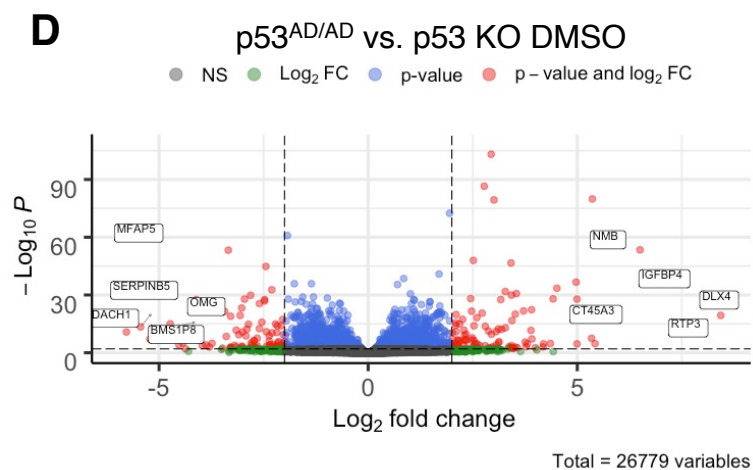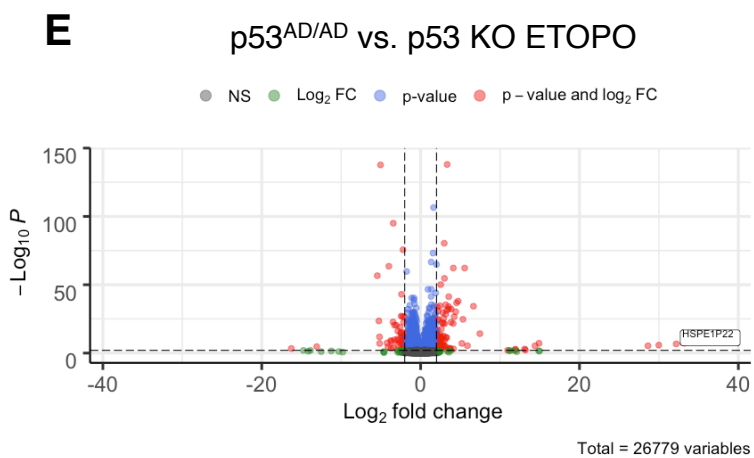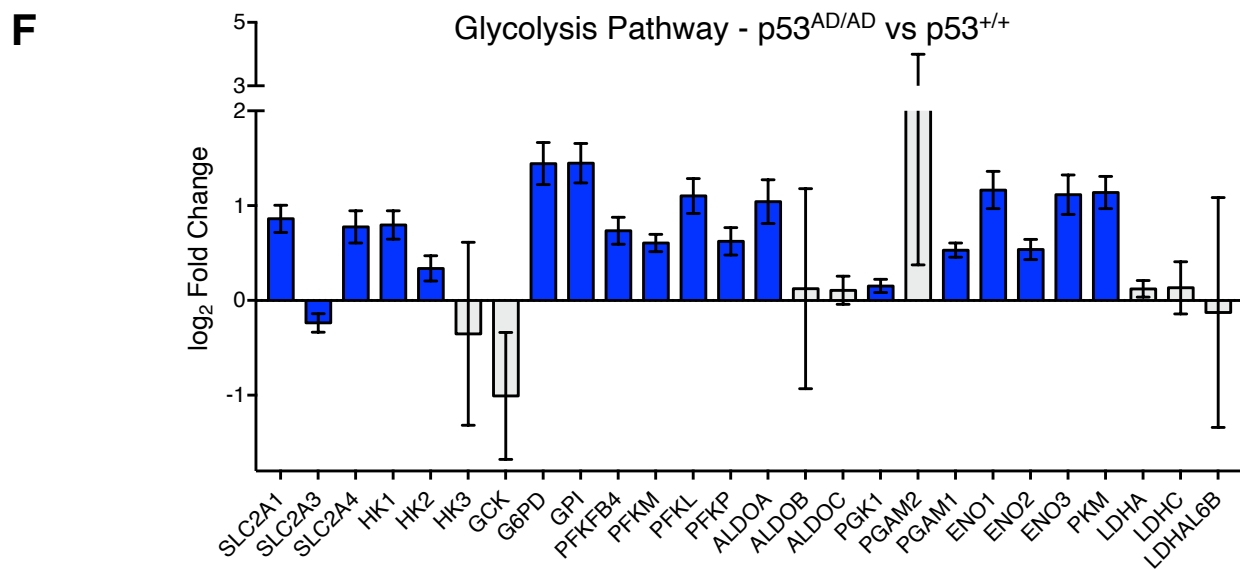

#### **Supplementary Figure S4. Dimeric mutant p53 cells exhibit an altered transcriptional profile**

**(A-E)** Volcano plots demonstrating differential gene expression in dimeric mutant p53-bearing cells relative to wild-type or p53 KO cells from either two biologically independent experiments in U2OS cells or one experiment in osteoblasts. Dots in red represent genes with a  $p$ -value of  $<0.01$  and a  $\log_2$  fold change  $>|2|$ . Dots in blue represent genes significantly differentially expressed ( $p$ -value $<0.01$ ). Dots in green represent genes that meet the  $\log_2$  fold change cutoff but not the significance threshold. Dots in grey are not significantly altered.

**(F)** Differential gene expression of glycolysis pathway genes in p53<sup>AD/AD</sup> U2OS cells relative to p53<sup>+/+</sup> U2OS cells shown as  $\log_2$  fold change. Data represent mean  $\pm$  SEM for four technical replicates. Bars in blue represent  $\log_2$  fold change values with a  $p<0.05$ . Statistical significance was assessed by two-tailed  $t$ -test. \*\*\* $p<0.001$ , \*\* $p<0.01$ , \* $p<0.05$

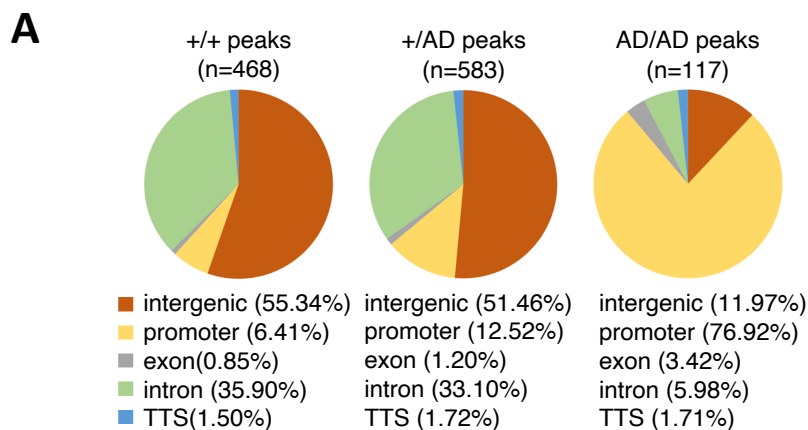

**B**

| p53 <sup>+/+</sup> Motif | Name   | p-value |
|--------------------------|--------|---------|
|                          | p73    | 1e-929  |
|                          | p53    | 1e-836  |
|                          | p63    | 1e-520  |
|                          | p53    | 1e-466  |
|                          | ZNF416 | 1e-71   |

| p53 <sup>+/AD</sup> Motif | Name   | p-value |
|---------------------------|--------|---------|
|                           | p73    | 1e-1020 |
|                           | p53    | 1e-915  |
|                           | p63    | 1e-583  |
|                           | p53    | 1e-477  |
|                           | ZNF416 | 1e-75   |

| p53 <sup>AD/AD</sup> Motif | Name | p-value |
|----------------------------|------|---------|
|                            | Elk4 | 1e-24   |
|                            | Elk1 | 1e-20   |
|                            | ETV1 | 1e-16   |
|                            | ETS  | 1e-15   |
|                            | ELF1 | 1e-15   |

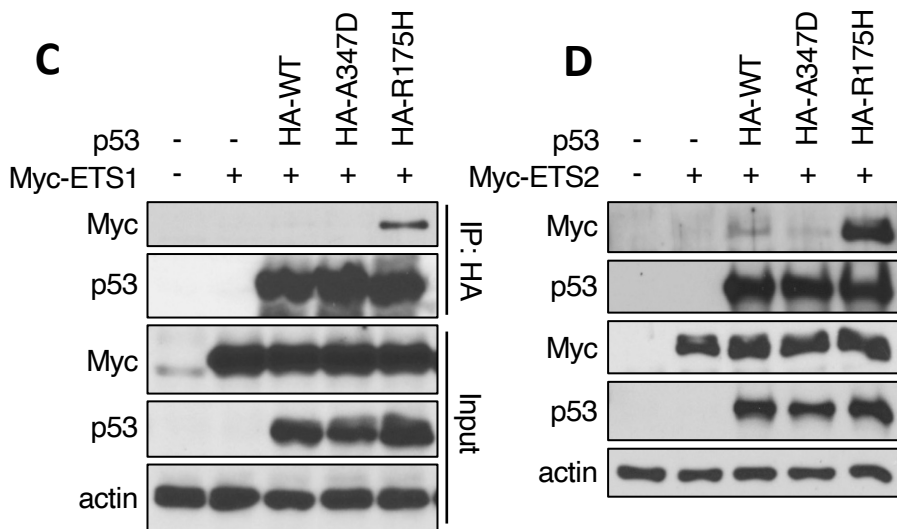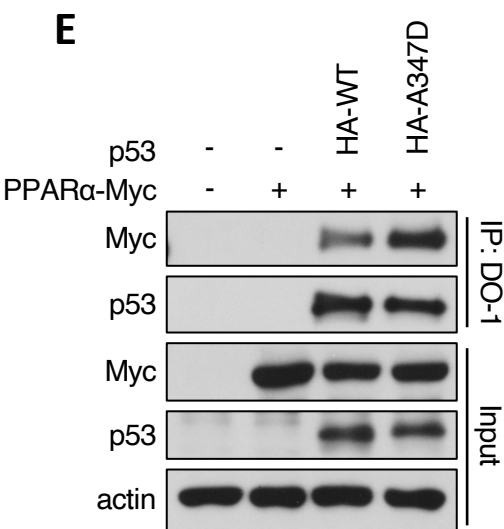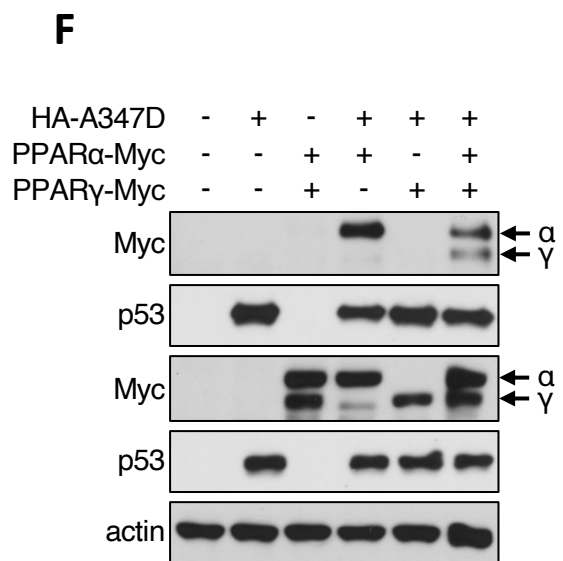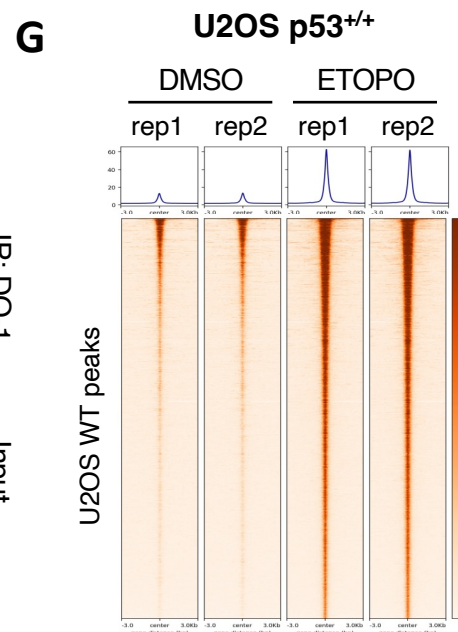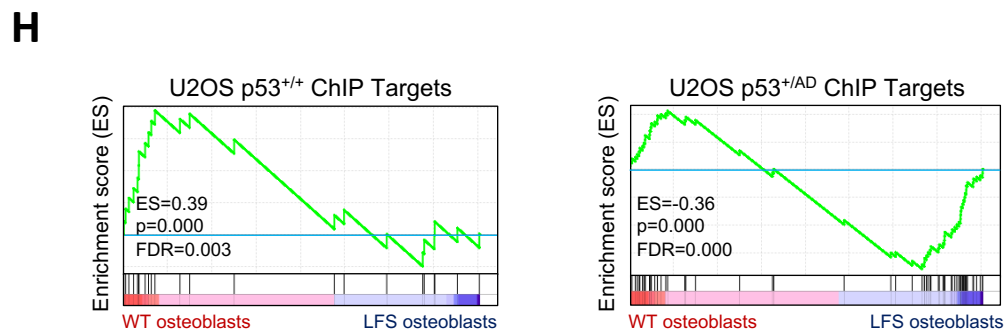

## **Supplementary Figure S5. Dimeric mutant p53 associates with novel genomic loci and binds PPAR proteins**

**(A)** Venn diagrams illustrate the genomic distribution of p53 binding sites in p53<sup>+/+</sup>, p53<sup>+/<sup>AD</sup></sup>, and p53<sup>AD/AD</sup> U2OS cells.

**(B)** Tables depict binding motifs identified by *de novo* motif enrichment analysis in p53<sup>+/+</sup>, p53<sup>+/<sup>AD</sup></sup>, and p53<sup>AD/AD</sup> U2OS cells.

**(C-D)** H1299 cells were co-transfected with the empty vector pcDNA3, HA-WT p53, HA-p53(A347D), or HA-p53(R175H) and myc-ETS1 or myc-ETS2 plasmids according to indicated combinations. Protein lysates were immunoprecipitated with anti-HA agarose beads and subjected to immunoblot analysis with indicated antibodies.

**(E-F)** U2OS p53 KO cells were co-transfected with the empty vector pcDNA3, HA-WT p53 or HA-p53(A347D) and myc-DDK-PPAR $\alpha$  and/or myc-DDK-PPAR $\gamma$  plasmids according to indicated combinations. Protein lysates were immunoprecipitated with anti-p53 (DO-1) and subjected to immunoblotting with indicated antibodies.

**(G)** Heatmaps demonstrate wild-type p53 binding to 1-kb genomic loci surrounding peaks identified in p53<sup>+/+</sup> U2OS cells upon treatment with DMSO or 20  $\mu$ M etoposide for 24 h.

**(H)** GSEA plots demonstrating enrichment of U2OS p53<sup>+/+</sup>, p53<sup>+/<sup>AD</sup></sup>, or p53<sup>AD/AD</sup> ChIP targets in LFS osteoblasts vs. WT osteoblasts expression datasets.

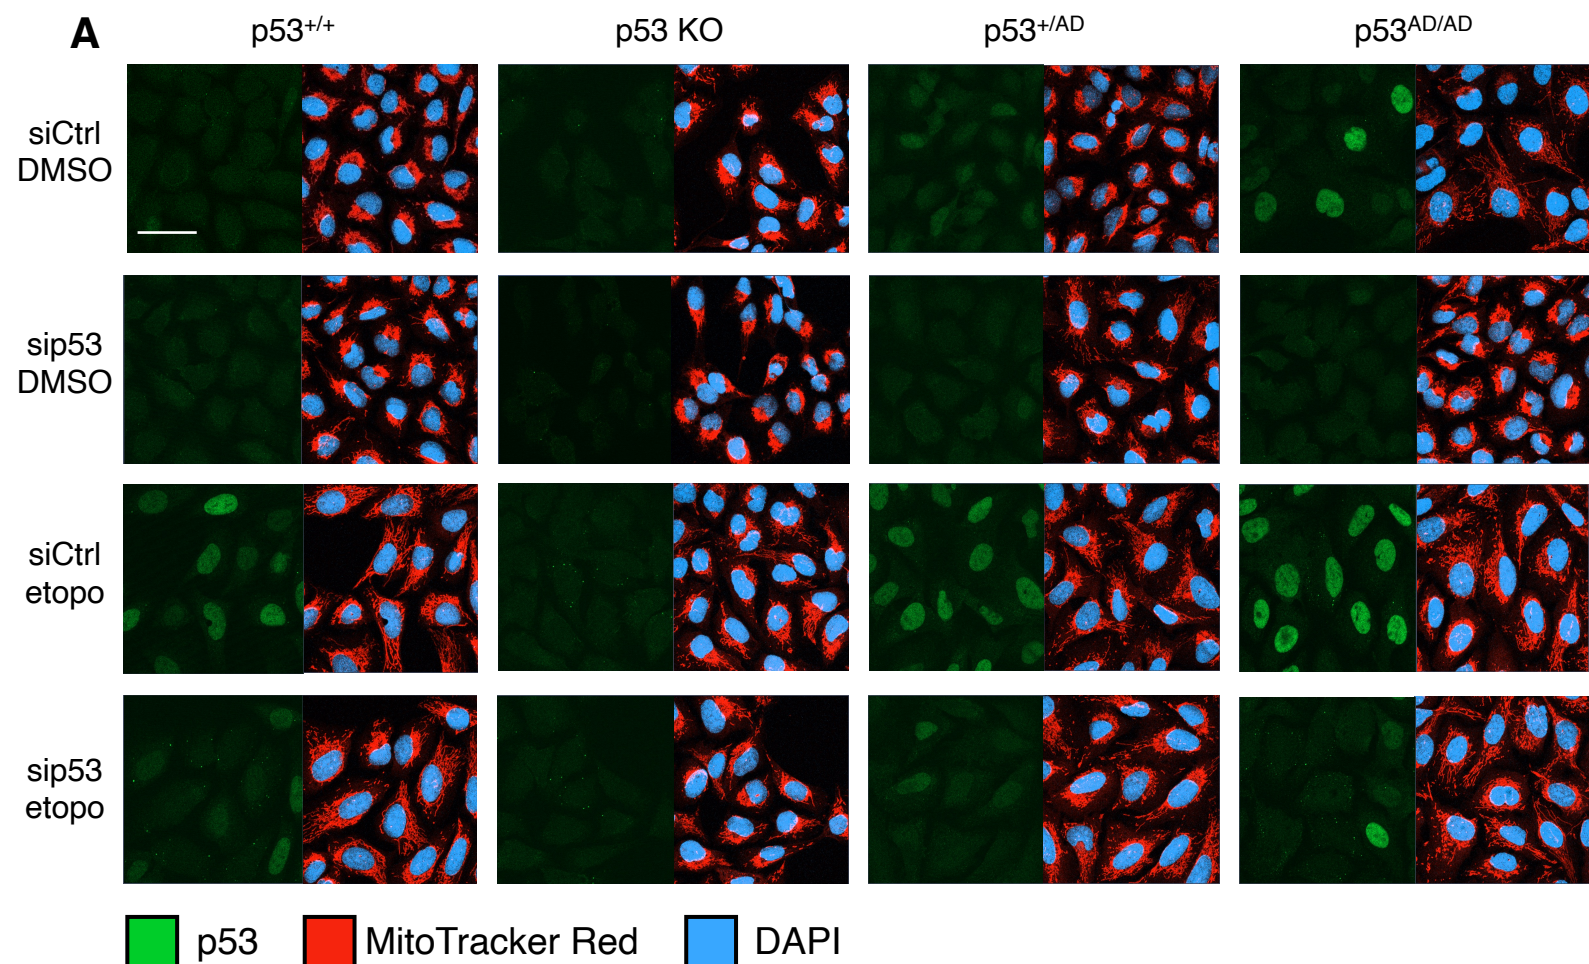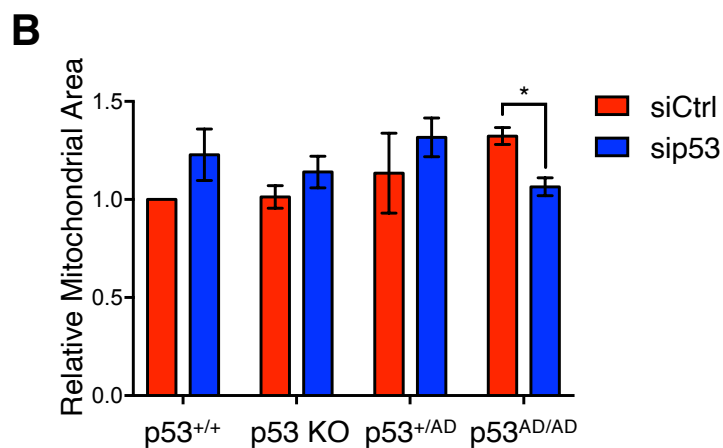

### Supplementary Figure S6. Dimeric mutant p53 promotes mitochondrial network aberration

**(A)** U2OS cells with p53<sup>+/+</sup>, p53 KO, p53<sup>+AD</sup>, and p53<sup>AD/AD</sup> were transfected with 25 nM of either a non-targeting siRNA pool or siRNA pool against p53 for 48 h and then were split onto coverslips and let adhere overnight. Cells were then treated with 20  $\mu$ M etoposide (etopo) for 24 h, fixed with 4% paraformaldehyde, and stained with an anti-p53 antibody (green), MitoTracker Red CMXRos (red), and DAPI (blue).

**(B)** Quantification of mitochondrial area per cell normalized to the U2OS p53<sup>+/+</sup> siCtrl DMSO condition. Bars represent the mean  $\pm$  SEM of three biologically independent experiments. (n=3, 7-12 images captured per group).

Statistical significance was assessed by two-tailed *t*-test. \**p*<0.05

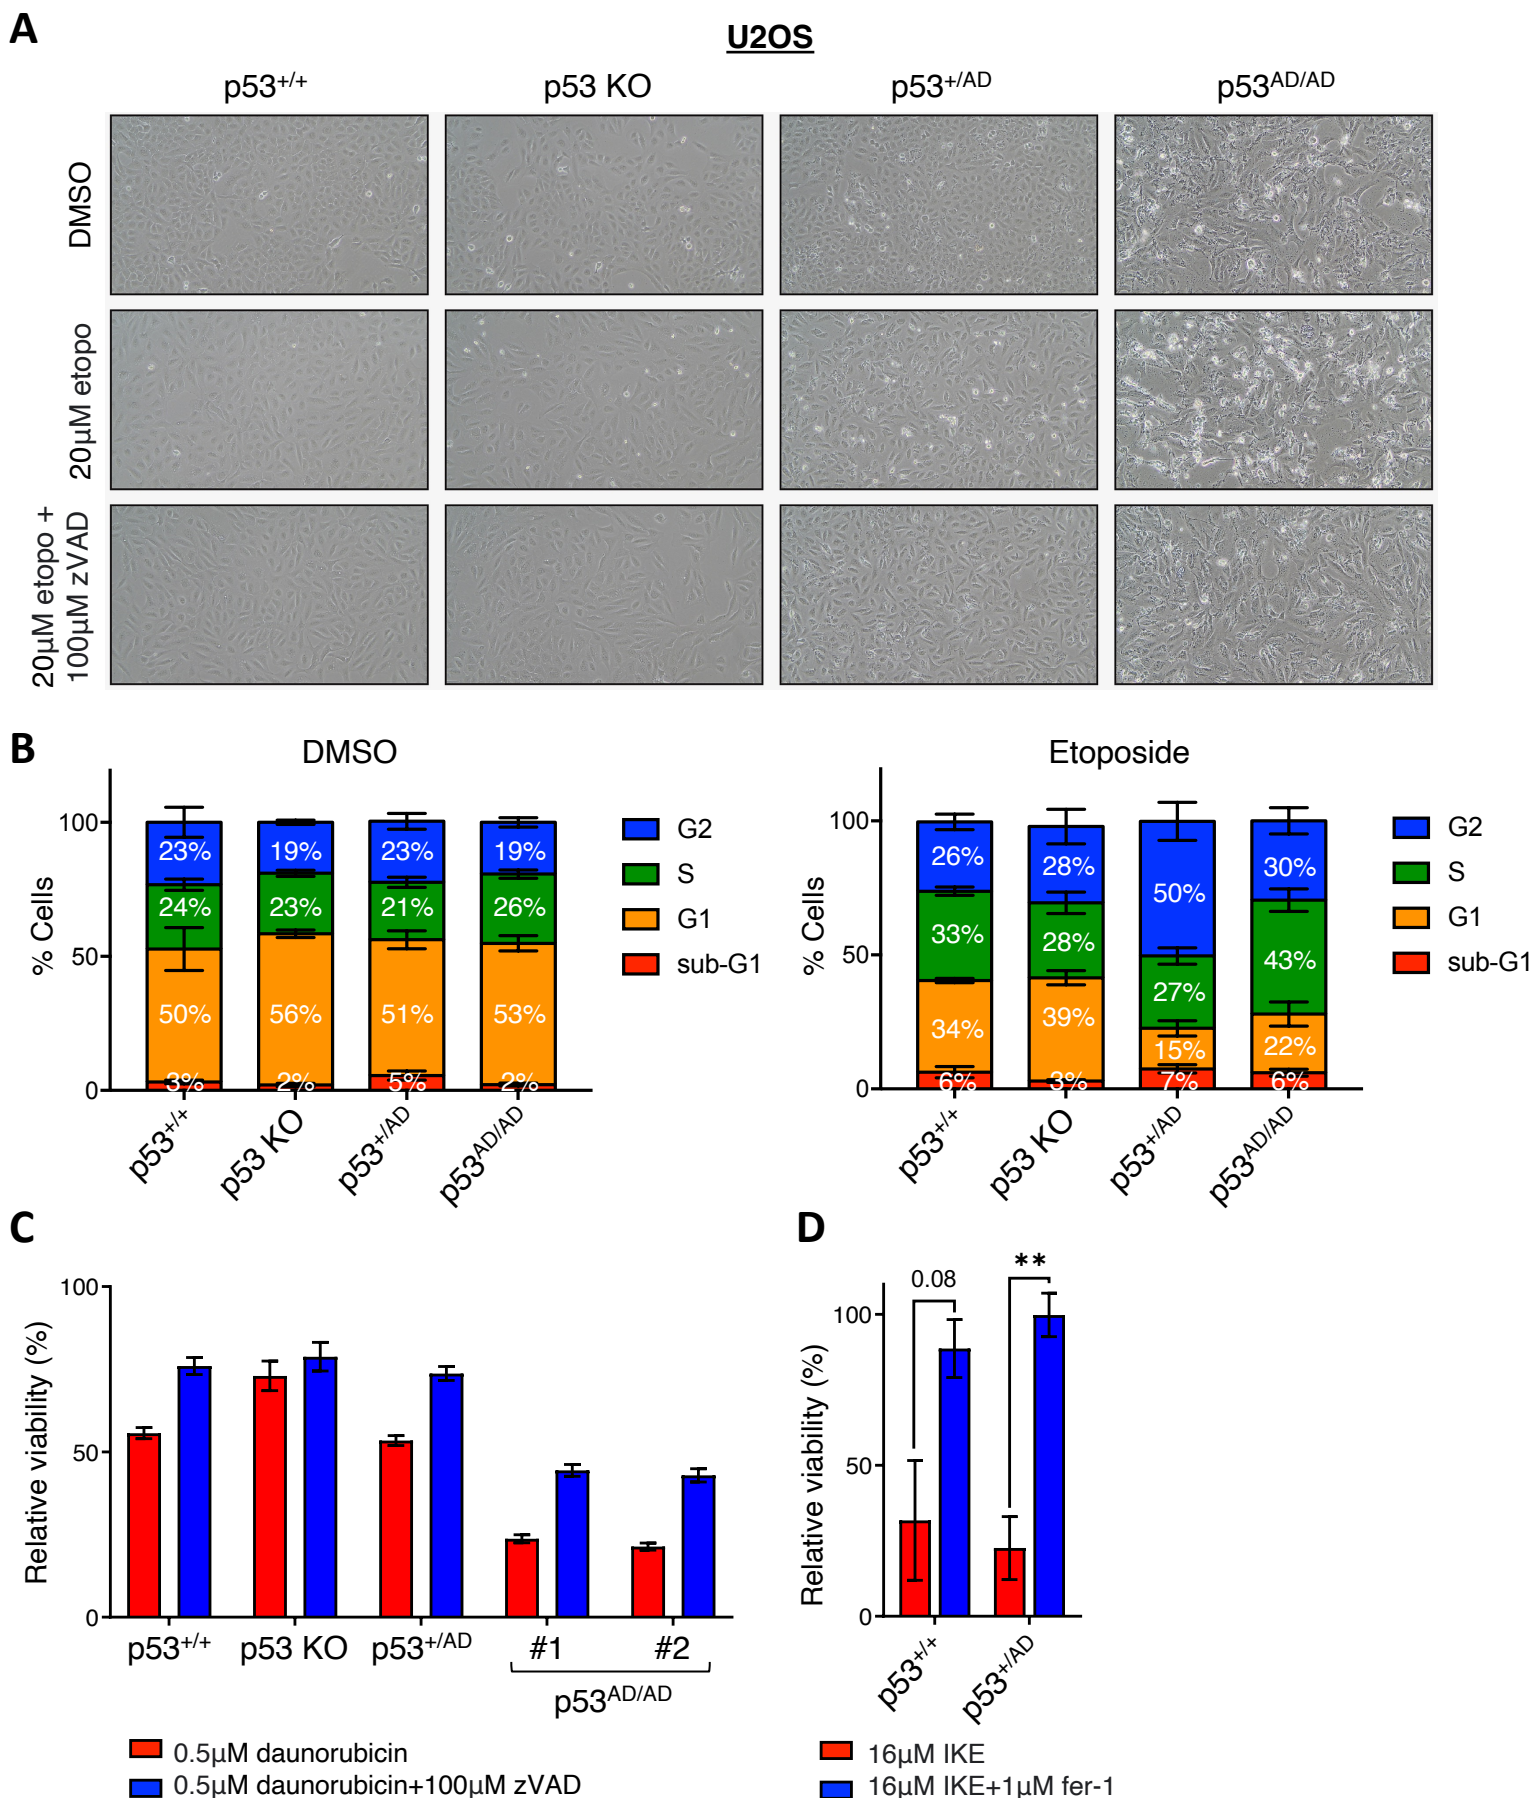

**Supplementary Figure S7. Mutant p53 U2OS cells experience elevated growth arrest and death upon topoisomerase-II inhibition**

**(A)** U2OS cells varying in p53 status (p53<sup>+/+</sup>, p53 KO, p53<sup>+AD</sup>, and p53<sup>AD/AD</sup>) were treated with DMSO, 20 μM etoposide (etopo), or 20 μM etopo + 100 μM zVAD-FMK (zVAD) for 48 h and visualized by brightfield microscopy.

**Supplementary Figure S7. Mutant p53 U2OS cells experience elevated growth arrest and death upon topoisomerase-II inhibition**

**(B)** Cell cycle profiles of U2OS cells varying in p53 status following treatment with either DMSO or 20  $\mu$ M etoposide for 24 h were determined by PI staining followed by flow cytometric analysis. Bars represent mean  $\pm$  SEM of five independent experiments (n=5).

**(C)** Viability of U2OS parental (p53<sup>+/+</sup>) and individual U2OS CRISPR clones treated for 72 h with DMSO, 0.5  $\mu$ M daunorubicin, and 0.5  $\mu$ M daunorubicin + 100  $\mu$ M zVAD-FMK (zVAD) was measured via neutral red uptake and normalized to the DMSO control for each cell line. Bars represent mean  $\pm$  SEM of three independent experiments (n=3).

**(D)** Viability of p53<sup>+/+</sup> and p53<sup>+/-AD</sup> U2OS cells treated with 16  $\mu$ M IKE or 16  $\mu$ M IKE + 1  $\mu$ M ferrostatin-1 for 48 h. Bars represent mean  $\pm$  SEM of three independent experiments (n=3).

Statistical significance was assessed by two-tailed *t*-test. \*\*p<0.01, \*p<0.05

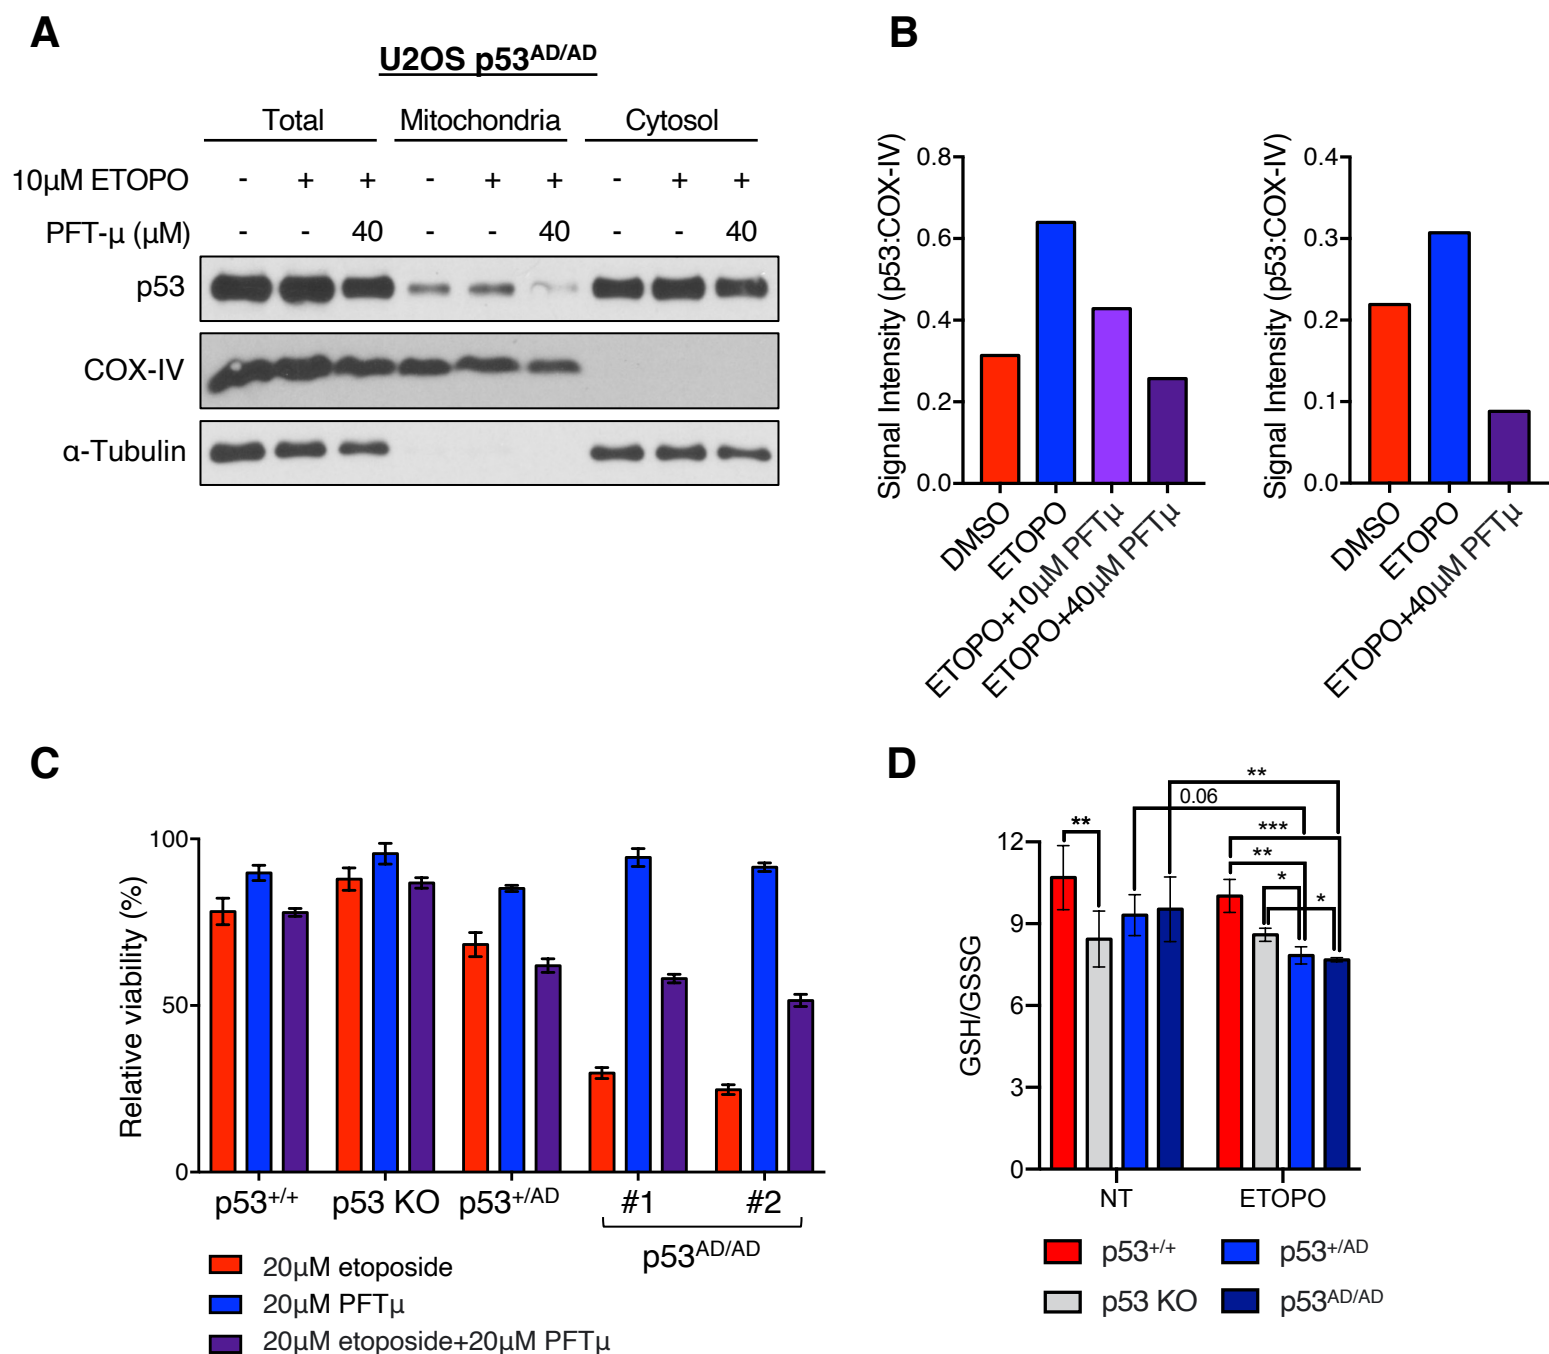

**Supplementary Figure S8. Pifithrin-μ disrupts p53(A347D) association with mitochondria and rescues etoposide-mediated cell death**

**(A)** Mitochondrial and cytosolic fractions were isolated from U2OS p53<sup>AD/AD</sup> cells treated with or without 10 μM etoposide in the presence or absence of 40 μM pifithrin-μ for 20 h. Isolated fractions and total cell lysates were subjected to immunoblot analysis with indicated antibodies.

**(B)** Densitometry analysis of mutant p53 in p53<sup>AD/AD</sup> U2OS cells associated with mitochondria under indicated conditions normalized to the mitochondrial loading control COX-IV from experiments shown in Fig. 6B (*left*) and Supplementary Fig. S8A (*right*).

**(C)** Viability of U2OS parental and individual U2OS CRISPR clones varying in p53 status treated with etoposide, PFTμ, and etoposide + PFTμ (B) at indicated concentrations for 48 h was measured via neutral red uptake and normalized to the DMSO control for each cell line. Bars represent mean ± SEM of three independent experiments (n=3).

**(D)** Ratios of reduced (GSH) to oxidized (GSSG) glutathione in U2OS parental and U2OS CRISPR cells (p53 KO, p53<sup>+/AD</sup>, and p53<sup>AD/AD</sup>) grown in low serum conditions with or without 20 μM etoposide for 24 h.

**A**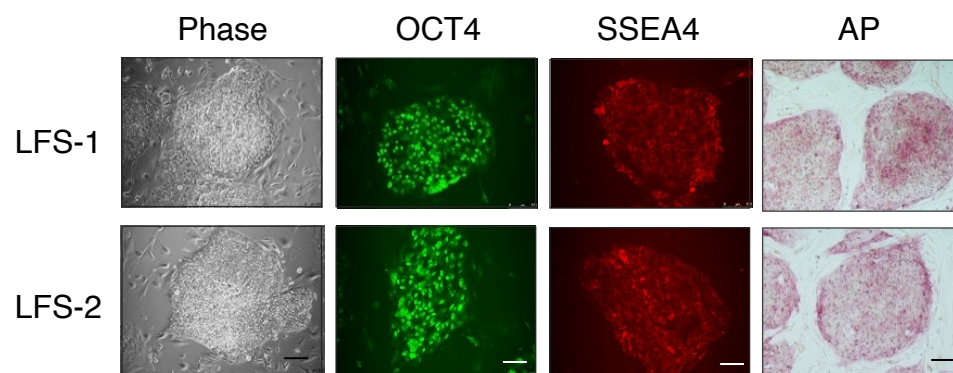**B**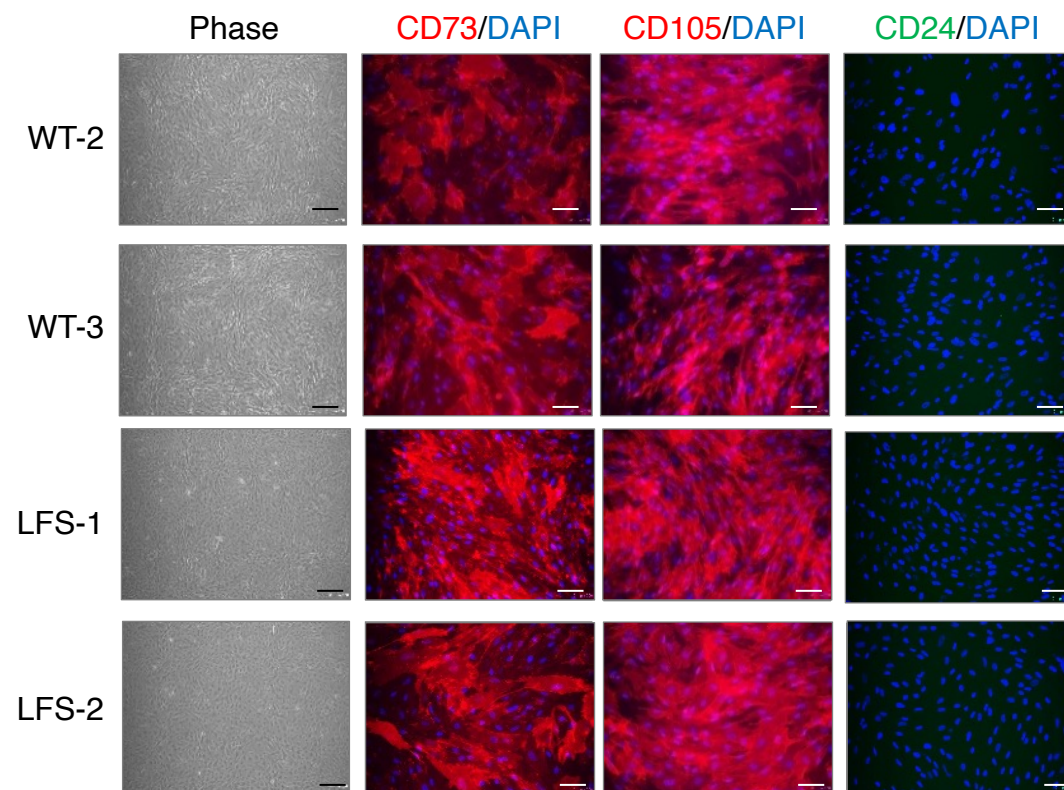

### Supplementary Figure S9. Characterization of LFS iPSCs and MSCs

**(A)** Single clones of LFS iPSCs (LFS-1 and LFS-2) express hESC pluripotency factor OCT4, hESC surface marker SSEA4, and alkaline phosphatase as visualized by both immunofluorescent and immunohistochemical staining. Scale bars represent 50  $\mu$ m.

**(B)** Single clones of either wild-type (WT-2 and WT-3) or LFS (LFS-1 and LFS-2) MSCs express MSC markers CD73 and CD105 but not pluripotent stem cell marker CD24 as visualized by immunofluorescent staining. Scale bars represent 50  $\mu$ m.
